# Supplementary material for: Canine Chondrodysplasia Caused by a Truncating Mutation in Collagen-Binding Integrin Alpha Subunit 10
Source: PLoS One. 2013 Sep 25;8(9):e75621. doi: 10.1371/journal.pone.0075621 (PMC3783422; doi:10.1371/journal.pone.0075621)
Supplement: Table S2 — ITGA10 sequencing and qPCR primers. (XLSX) [file pone.0075621.s003.xlsx]

## Sheet: Table S2.
Table S2. ITGA10 sequencing primers.
Target	Amplified region	Amplicon ID	Forward primer sequence 5'>3'	Reverse primer sequence 5'>3'	Product size (bp)	Ta (°C)
ITGA10	Exon 1	ITGA10_Exo1	TTCTCCTTTCCTTGGTCTGG	AATCCTAAAAGGTCCCAATGC	296	60
genomic	Exon 2	ITGA10_Exo2	CTCTCTGGTTGTGCCTCTCC	CCAGCCACTTCCAAAAGACC	299	60
	Exon 3 + 4	ITGA10_Exo3-4	CATGCATTTTCCCTCTGTCC	ATAGACCCGTCTCCCTCACC	550	64
	Exon 5	ITGA10_Exo5	AGATAAAGGAGGGGAATCTCG	CAAGGAGGAAAGCTGTGTGG	283	60
	Exon 6 + 7	ITGA10_Exo6-7	TCCCTTGCTGTCTTCATGC	CTCCAGACCCTCCCCTAAGC	565	64
	Exon 8	ITGA10_Exo8	CTGACCTCGGTGAACTGC	TGGGAAGTGGTTGATGTCC	350	60
	Exon 9 + 10	ITGA10_Exo9-10	CATTTTCATTGGCTGTGTCC	AGAACCCTGAGTTGAAGTTGC	550	60
	Exon 11	ITGA10_Exo11	CATGCCTTTCCAACTGACC	GAGGAGGTTCCAAGGAGAGC	367	64
	Exon 12	ITGA10_Exo12	CTAATCTGCTGCTCTCCTTGG	CTCTTGACCCTTCCCTTTCC	335	60
	Exon 13	ITGA10_Exo13	AATCTGCAAAGGGTGTGAGG	GCCTTCTTTCCCTTCTTTCC	319	62
	Exon 14	ITGA10_Exo14	GGGCTCACTGACAGCTTGG	GGAAACATGGAGGAGCAAGG	356	64
	Exon 15	ITGA10_Exo15	CAGGCTGCTGTATTAGAGACTCC	TCCAAGTCTGACTCCCAAGC	349	60
	Exon 16 + 17	ITGA10_Exo16-17	CTGGGAGGCCAACACTGG	ATTCCTCCTCCCATCAGTCC	554	64
	Exon 18	ITGA10_Exo18	AGGACAGTACCCAGCACAGG	TTGCCACAATATCAGGTCTCC	337	62
	Exon 19 + 20	ITGA10_Exo19-20	TTTTCACTTTTCCCCTAATTCC	CCCATACCCCTGTCTTCTCC	524	60
	Exon 21	ITGA10_Exo21	GCTGTGAAGGCCCAGAGG	GCCCTTGTGTACCTCCTTCC	286	64
	Exon 22 + 23	ITGA10_Exo22-23	GGCCCAGAATGAGAAAGAGG	TGAAACACATGGAAGGAAAGG	499	60
	Exon 24 + 25	ITGA10_Exo24-25	CTGAATCCGTGTCTGTGTGC	CCAGCAGATGGGAGGTTAGG	522	64
	Exon 26 + 27	ITGA10_Exo26-27	GCTTGTTTGAGGAGAAAGAAAGG	TCAGGTAGGAGTGGAAAGATGG	548	64
	Exon 28	ITGA10_Exo28	CCTACCAGCCTCATCTTTGC	TAAGGCAGTCAGACCCAAGC	344	64
	Exon 29	ITGA10_Exo29	CCCAATAATGGGAAGTGAGG	AGAGATCCAGGCAGGACACC	312	64
	Exon 30	ITGA10_Exo30	GATATGTCTGAGGGCTGTTGG	CCAAACCTTGGCTCTTATGC	211	64
ITGA10	Exons 1-6	ITGA10_mRNA_1	ATGGAACTCCCCCTCATCC	CCAGGGATAGATGCTATTGGA	543	58
mRNA	Exons 5-8	ITGA10_mRNA_2	GATATGTGCCCGCGTAGATG	GGTCACTCTTCCAGCCTCAC	475	58
	Exons 8-13	ITGA10_mRNA_3	TCAGTCTGTCCCGTGGTG	AACCCTCACAGCCCCATC	650	58
	Exons 12-14	ITGA10_mRNA_4	TGTTTCCTCCATGCTTTTGC	TGGAGTGTCAGCAAGGACTG	306	58
	Exons 13-16	ITGA10_mRNA_5	GAGCTCTGCCCATTGGATAC	AGGTCACTTGGAAGCAAAGG	592	58
	Exons 15-20	ITGA10_mRNA_6	TGGATGGAGATGACCTGGTAG	CCAGATGGAGGTTTCTGGAG	696	58
	Exons 20-23	ITGA10_mRNA_7	GCTCTAGGAGGGACCCATTC	TGGGCTGTGTTATCTTGAAGG	364	58
	Exons 21-28	ITGA10_mRNA_8	ACCCTGTCTTTCGGACTGG	TGACCACCGTCAGAGACTTG	609	58
	Exons 27-30	ITGA10_mRNA_9	AACACTCGGTGTCAGGTCGT	CATTGCTCCAATTTCCCTTC	380	58
Ta refers to the used annealing temperature.
